# Supplementary material for: Formation and characterization of crosslinks, including Tyr–Trp species, on one electron oxidation of free Tyr and Trp residues by carbonate radical anion
Source: Royal Society of Chemistry journal article supplement (doi:10.1039/d0ra04051g), 2020-01-01
Supplement: d0ra04051g1.pdf [file d0ra04051g1.pdf]

Formation and characterization of crosslinks, including Tyr-Trp species, on one electron oxidation of free Tyr and Trp residues by carbonate radical anion.

## Supplementary Figures

Juan David Figueroa,<sup>a1</sup> Ana María Zárate,<sup>a1</sup> Eduardo Fuentes-Lemus,<sup>a</sup>

Michael J. Davies,<sup>b</sup> Camilo López-Alarcón<sup>a\*</sup>

<sup>a</sup> Pontificia Universidad Católica de Chile· Facultad de Química y de Farmacia, Departamento de Química Física, Santiago, Chile.

<sup>b</sup> University of Copenhagen, Department of Biomedical Sciences, Copenhagen, Denmark.

<sup>1</sup> Both authors contributed equally to this work.

\*Corresponding author: C. López-Alarcón ([clopezr@uc.cl](mailto:clopezr@uc.cl))

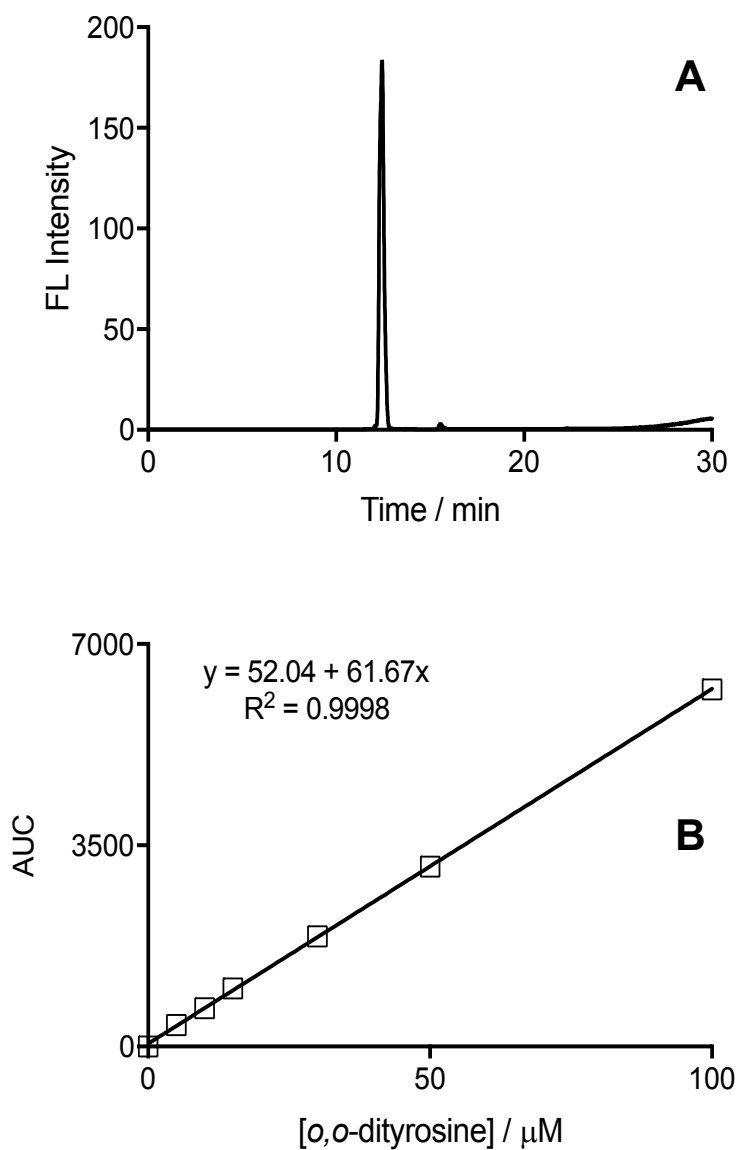

**Supplementary Figure 1.**

Quantification of *o,o*-dityrosine by liquid chromatography with fluorescence detection. Panel A shows a representative chromatogram, obtained using  $\lambda_{\text{ex}}$  280 and  $\lambda_{\text{em}}$  410 nm, obtained for a solution containing the commercial standard of di-Tyr at 50  $\mu\text{M}$  (in phosphate buffer 75 mM, pH 7.4). Panel B depicts the calibration curve constructed using the area under the curve (AUC) of the HPLC peaks registered between 5 and 100  $\mu\text{M}$  of *o,o'*-di-Tyr (commercial standard). Data represent the average of at least three independent experiments, each measured in triplicate.

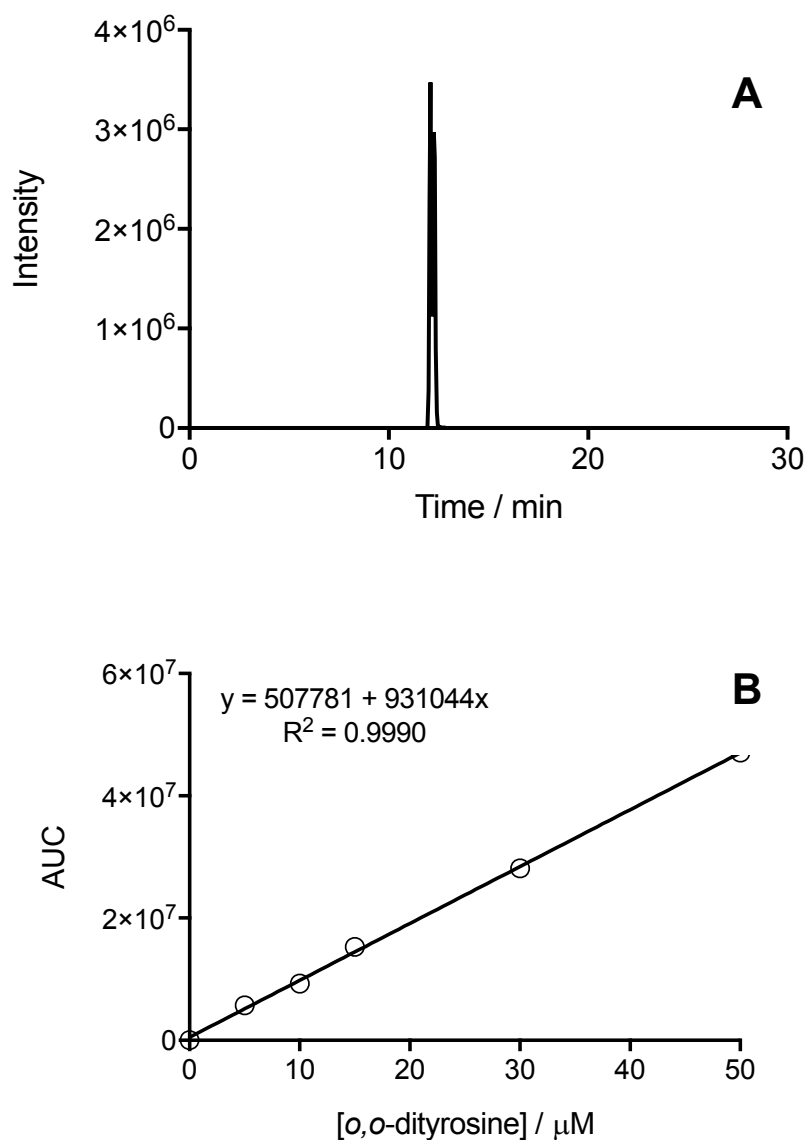

### Supplementary Figure 2.

Quantification of *o,o'*-dityrosine by liquid chromatography (UPLC) with mass spectrometry (MS) detection. Panel A shows a representative chromatogram registered using the SRM mode (361  $\rightarrow$  315) obtained for a solution containing the commercial standard of di-Tyr at 50  $\mu\text{M}$  (phosphate buffer 75 mM, pH 7.4). Panel B depicts the calibration curve constructed from the area under the curve (AUC) of the UPLC peaks detected for 5 - 100  $\mu\text{M}$  of *o,o'*-di-Tyr (commercial standard). Data represent the average of at least three independent experiments, each measured in triplicate.

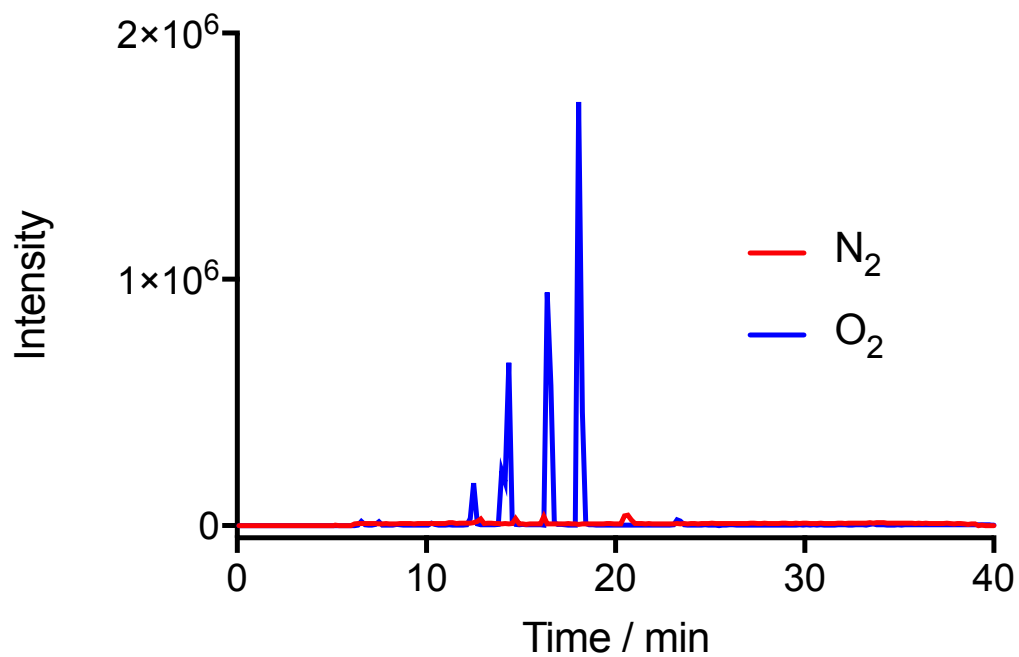

**Supplementary Figure 3.**

Extracted ions chromatograms at  $m/z$  237, obtained from Trp (1 mM) samples illuminated (at 254 nm for 3 min) under aerobic ( $O_2$  20%, blue trace), and anaerobic ( $N_2$  bubbling; red trace) in the presence of the  $[Co(NH_3)_5(CO_3)]NO_3$  complex (4 mM).

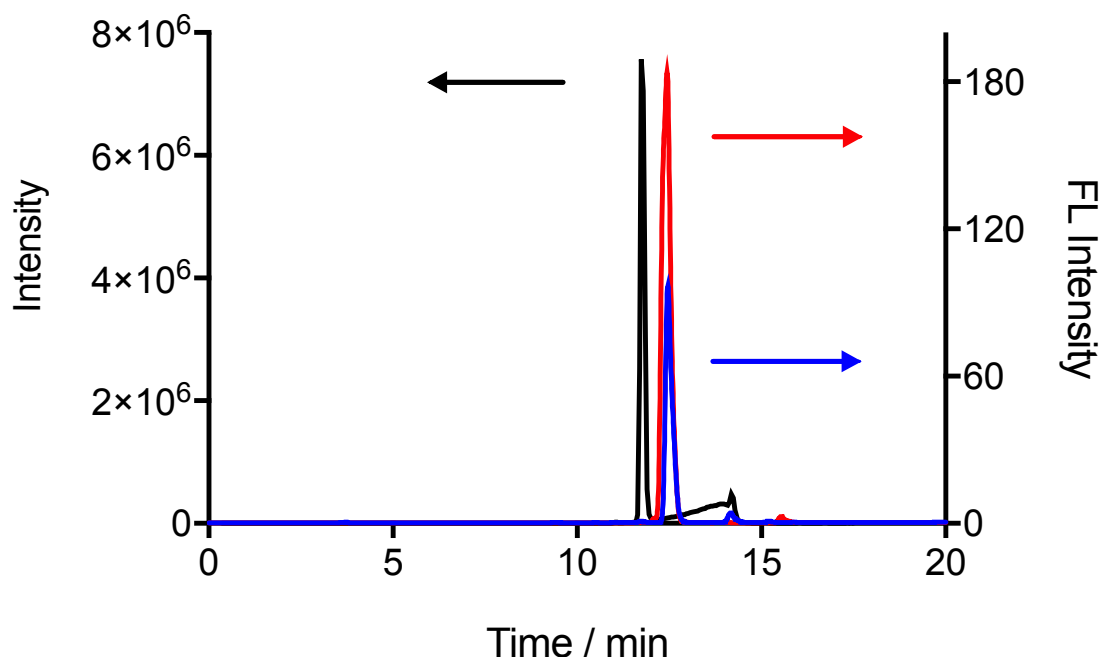

**Supplementary Figure 4.**

Comparative detection of di-Tyr in samples containing Tyr (1 mM) illuminated for 3 min in the presence of 4 mM  $[\text{Co}(\text{NH}_3)_5(\text{CO}_3)]\text{NO}_3$  under an atmosphere of  $\text{N}_2$ . Black line shows a typical UPLC chromatogram obtained by MS fragmentation analysis (transition  $m/z$  361  $\rightarrow$  315) employing the SRM mode. Red and blue lines show HPLC chromatograms obtained with fluorescence detection ( $\lambda_{\text{ex}}$  280 and  $\lambda_{\text{em}}$  410 nm) for the *o,o*-dityrosine commercial standard (50  $\mu\text{M}$ ), and the illuminated Tyr- $[\text{Co}(\text{NH}_3)_5(\text{CO}_3)]\text{NO}_3$  solution, respectively. The observed differences between the retention times determined by UPLC-MS and HPLC-FL (12.4 versus 11.8 min) are attributed to the use of different instruments for these assays.

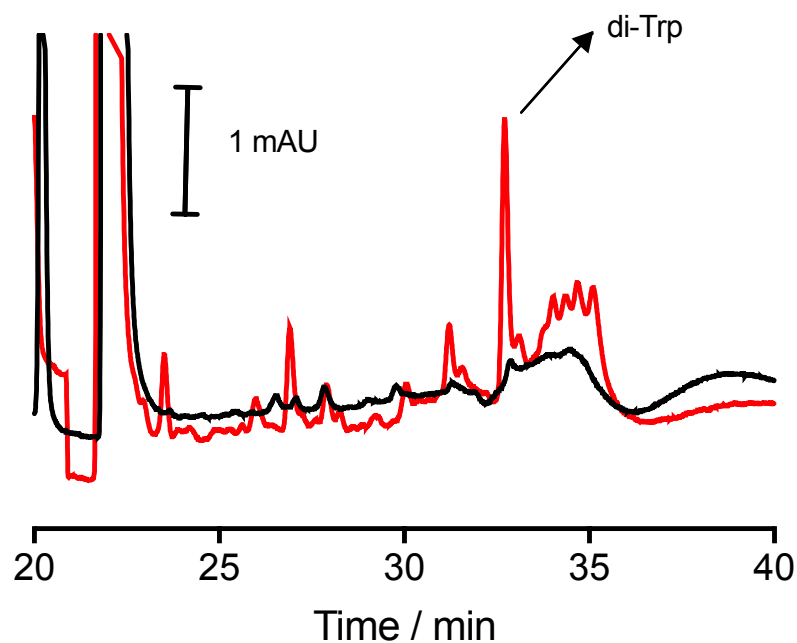

**Supplementary Figure 5.**

Comparative detection of di-Trp in samples containing Trp (1 mM) illuminated for 3 min in the presence of 4 mM  $[\text{Co}(\text{NH}_3)_5(\text{CO}_3)]\text{NO}_3$  under an atmosphere of  $\text{N}_2$ . Red trace shows a typical HPLC chromatogram obtained with DAD detection (fixed at 280 nm). Black trace shows a HPLC-DAD chromatogram obtained for control solutions (not illuminated). Identification of the di-Trp peak was carried out based on the retention time.

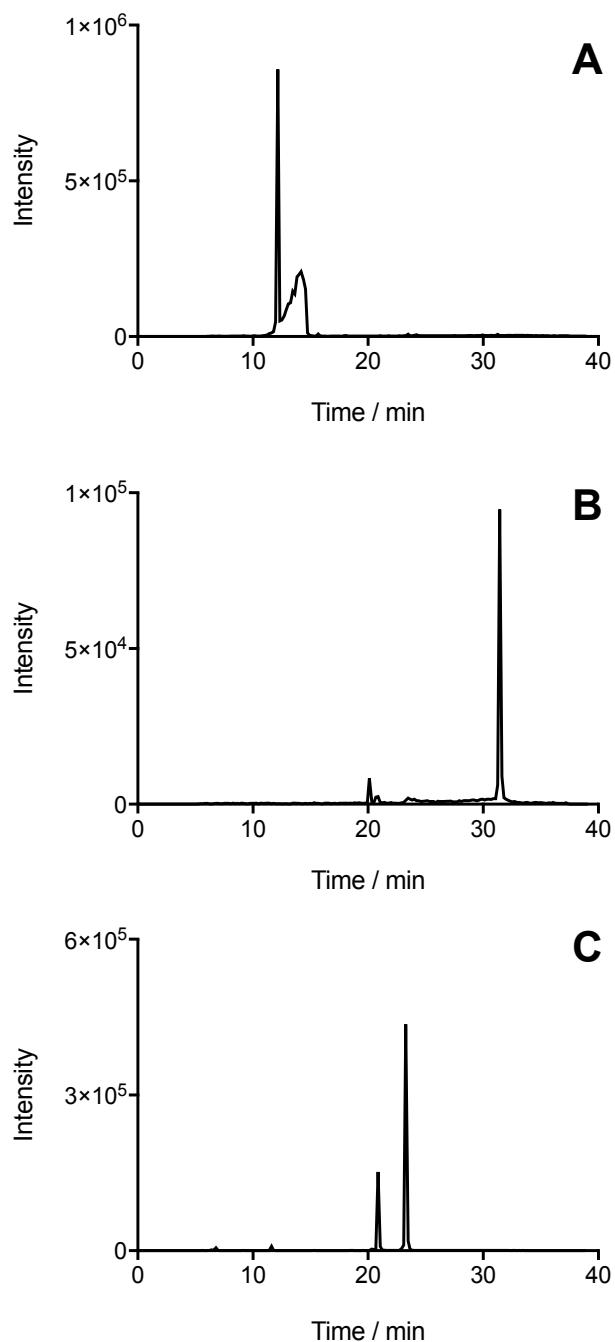

### Supplementary Figure 6.

Extracted ions chromatograms for detection of di-Tyr (panel A), di-Trp (panel B), and Tyr-Trp (panel C) obtained from solutions containing Tyr and Trp, each at  $250 \mu\text{M}$  ( $500 \mu\text{M}$  total concentration) illuminated (at  $254 \text{ nm}$  for  $3 \text{ min}$ ) in the presence of  $4 \text{ mM}$   $[\text{Co}(\text{NH}_3)_5(\text{CO}_3)]\text{NO}_3$ , under an atmosphere of  $\text{N}_2$ . The SRM mode, using  $361 \rightarrow 315$ ;  $407 \rightarrow 203$ , and  $384 \rightarrow 203$ , was employed for the detection of di-Tyr, di-Trp and Tyr-Trp, respectively. It should be noted that under these conditions (total concentration of  $500 \mu\text{M}$ ) only two peaks were registered for  $384 \rightarrow 203$ .

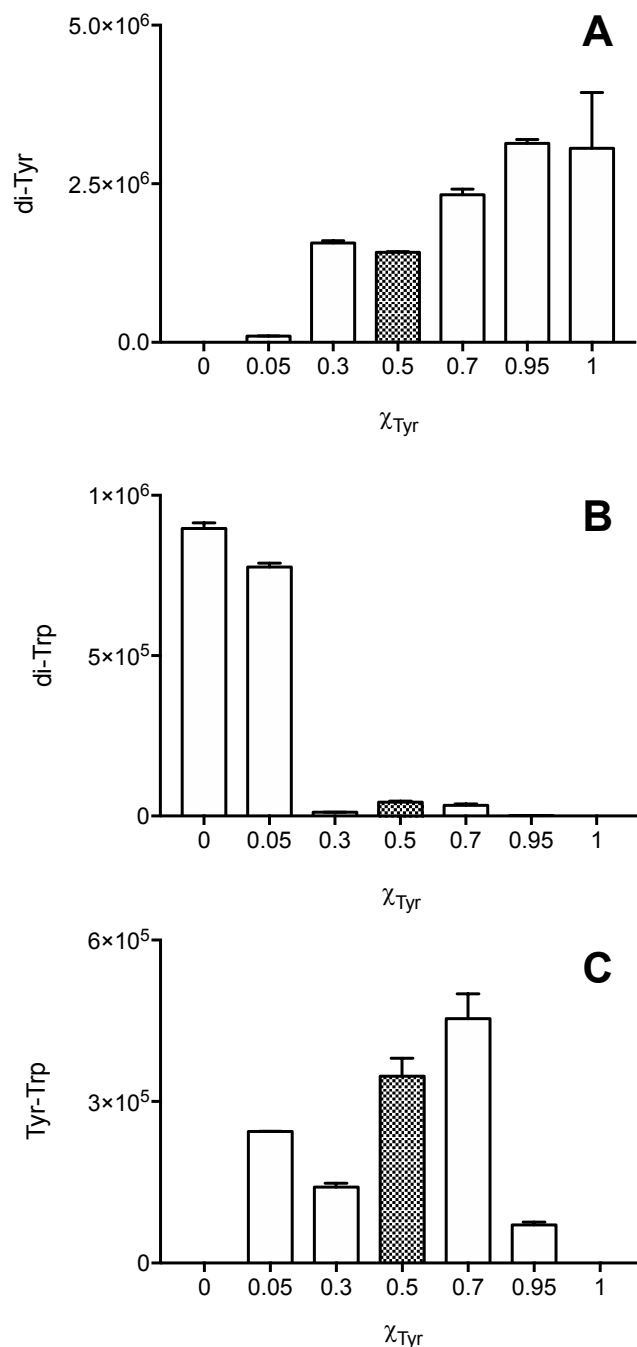

### Supplementary Figure 7.

Formation of di-Tyr, di-Trp and Tyr-Trp depends on the concentration of Tyr and Trp. Solutions containing Tyr and Trp (1 mM total concentration) in phosphate buffer 75 mM, pH 7.4 (DTPA 0.1 mM) were illuminated for 3 min at 254 nm in the presence of 4 mM  $[\text{Co}(\text{NH}_3)_5(\text{CO}_3)]\text{NO}_3$  under an atmosphere of  $\text{N}_2$ . The area under the curve of the chromatographic peaks for di-Tyr (MS transition  $m/z$  361  $\rightarrow$  315, panel A), di-Trp ( $m/z$  407  $\rightarrow$  203, panel B), and Tyr-Trp ( $m/z$  384  $\rightarrow$  367, panel C), were determined by MS as described in Material and methods. The concentrations of Tyr and Trp are expressed as molar fraction of Tyr ( $\chi_{\text{Tyr}}$ ), which means  $\chi_{\text{Tyr}} = 0$  a solution containing Trp 1 mM without Tyr, and  $\chi_{\text{Tyr}} = 1$ , a solution containing Tyr 1 mM without Trp.
